# Supplementary material for: Iron-activated carbon nanocomposite: synthesis, characterization and application for lead removal from aqueous solution
Source: Royal Society of Chemistry journal article supplement (doi:10.1039/c5ra27923b), 2016-01-01
Supplement: c5ra27923b1.pdf [file c5ra27923b1.pdf]

Supplementary Information (SI) for

**Iron-activated carbon nanocomposite: synthesis, characterization  
and application for lead removal from aqueous solution**

H. Sharififard,<sup>a</sup> F. Pepe,<sup>b†</sup> M. Soleimani,<sup>a</sup> P. Aprea,<sup>c</sup> and D. Caputo<sup>c</sup>

<sup>a</sup>Department of Chemical Engineering, Amirkabir University of Technology,  
No.424, Hafez Ave., Tehran, Iran.

<sup>b</sup>Dipartimento di Ingegneria, Università del Sannio, Piazza Roma 21, 82100 Benevento, Italy.

<sup>c</sup>Dipartimento di Ingegneria Chimica, dei Materiali e della Produzione Industriale,  
Università Federico II, P.le Tecchio 80, 80125, Napoli, Italy.

† Corresponding author: Prof. Francesco Pepe; e-mail: francesco.pepe@unisannio.it.

Submitted to **RSC Advances**

Prepared on April 18, 2016

Supplementary Information with 3 Figures and 3 Tables.

### List of Supplementary Figures:

**Figure S1.** XRD patterns for AC and IAC nanocomposite.

**Figure S2.** Perturbation plot for lead removal at central point of design parameters.  $X_1$ : solution pH;  $X_2$ : solid to liquid ratio ( $\text{g L}^{-1}$ );  $X_3$ : initial concentration of Pb(II) ( $\text{mg L}^{-1}$ ). Reference point: pH=4.25, solid to liquid ratio:  $1.75 \text{ g L}^{-1}$ ,  $C_0=60 \text{ mg L}^{-1}$ .

**Figure S3.** Relationship between  $\ln(K_L)$  and  $1/T$  for lead adsorption on IAC nanocomposite.

### List of Supplementary Tables:

**Table S1:** Experimental condition and results for lead removal.

**Table S2:** Constants and regression coefficients for kinetic models.

**Table S3:** Thermodynamic parameters for lead removal on IAC nanocomposite.

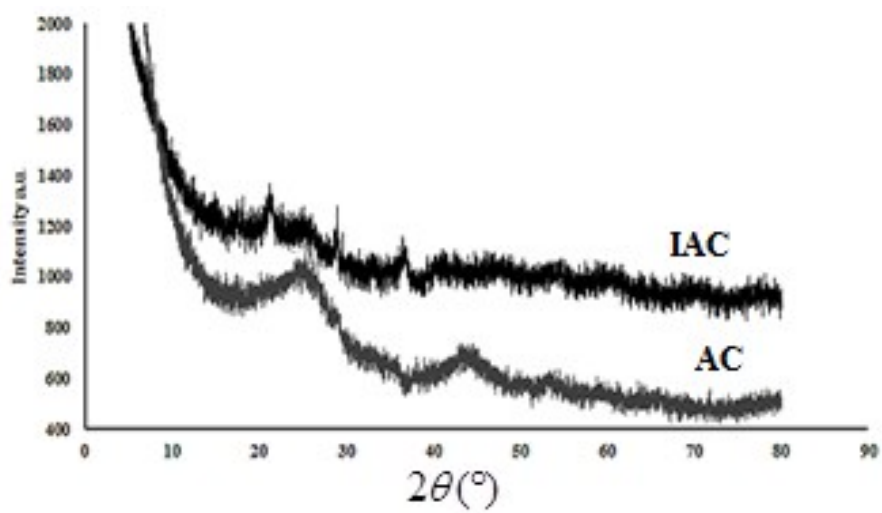

**Figure S1.** XRD patterns for AC and IAC nanocomposite.

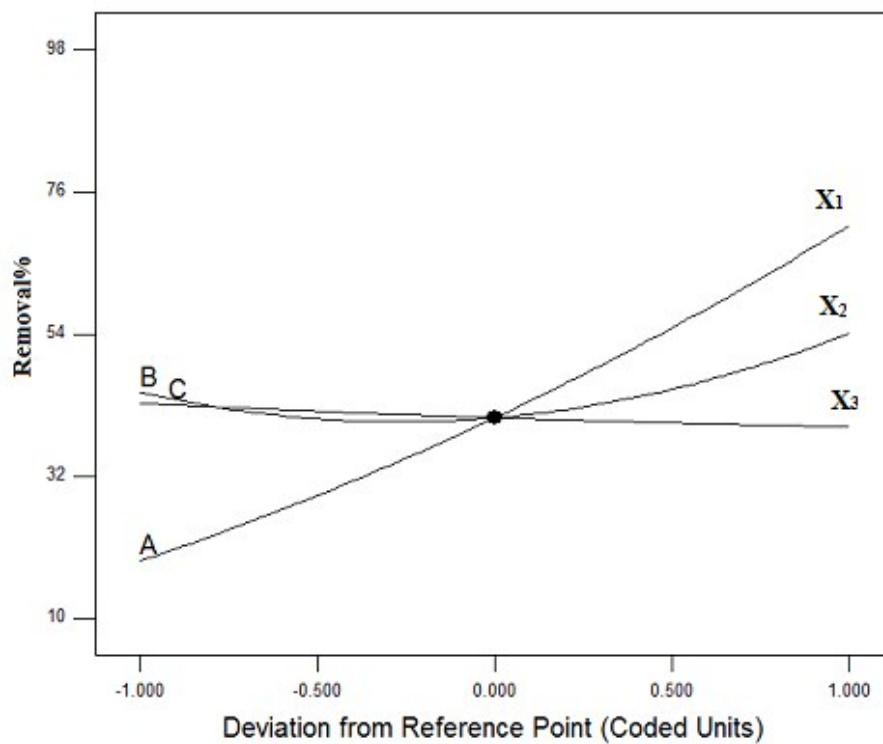

**Figure S2.** Perturbation plot for lead removal at central point of design parameters.  
 $X_1$ : solution pH;  $X_2$ : solid to liquid ratio ( $\text{g L}^{-1}$ );  $X_3$ : initial concentration of Pb(II) ( $\text{mg L}^{-1}$ ).  
 Reference point: pH=4.25, solid to liquid ratio:  $1.75 \text{ g L}^{-1}$ ,  $C_0=60 \text{ mg L}^{-1}$ .

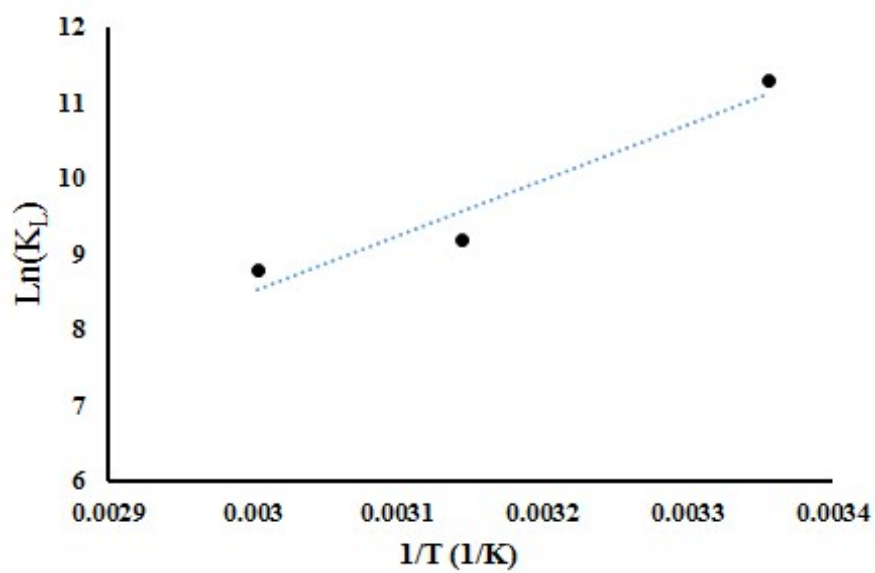

**Figure S3.** Relationship between  $\ln(K_L)$  and  $1/T$  for lead adsorption on IAC nanocomposite.

**Table S1.** Experimental condition and results for lead removal.

| Run | pH   | Solid to Liquid Ratio (g L <sup>-1</sup> ) | Initial Concentration (mg L <sup>-1</sup> ) | Removal % |
|-----|------|--------------------------------------------|---------------------------------------------|-----------|
| 1   | 4.25 | 1.75                                       | 60                                          | 42.59     |
| 2   | 4.25 | 1.75                                       | 115                                         | 35.6      |
| 3   | 6.72 | 1.75                                       | 60                                          | 72.85     |
| 4   | 4.25 | 0.38                                       | 60                                          | 45        |
| 5   | 4.25 | 1.75                                       | 5                                           | 46.5      |
| 6   | 4.25 | 1.75                                       | 60                                          | 40.51     |
| 7   | 1.77 | 1.75                                       | 60                                          | 17.46     |
| 8   | 6.5  | 0.5                                        | 110                                         | 69.41     |
| 9   | 4.25 | 1.75                                       | 60                                          | 40.78     |
| 10  | 2    | 3                                          | 10                                          | 21.87     |
| 11  | 4.25 | 1.75                                       | 60                                          | 41.41     |
| 12  | 6.5  | 0.5                                        | 10                                          | 88.76     |
| 13  | 4.25 | 1.75                                       | 60                                          | 41.41     |
| 14  | 2    | 3                                          | 110                                         | 49.18     |
| 15  | 6.5  | 3                                          | 10                                          | 98        |
| 16  | 4.25 | 1.75                                       | 60                                          | 41.41     |
| 17  | 6.5  | 3                                          | 110                                         | 66        |
| 18  | 4.25 | 3.13                                       | 60                                          | 56.6      |
| 19  | 2    | 0.5                                        | 10                                          | 10.4      |
| 20  | 2    | 0.5                                        | 110                                         | 29.55     |

**Table S2.** Constants and regression coefficients for kinetic models.

| <b>Model</b>             | <b>Parameter</b>                                    | <b>Value</b> |
|--------------------------|-----------------------------------------------------|--------------|
| Pseudo-first-order       | $q_{e,exp}$ (mg g <sup>-1</sup> )                   | 72.36        |
|                          | $k_1$ (min <sup>-1</sup> )                          | 0.0092       |
|                          | $q_e$ (mg g <sup>-1</sup> )                         | 26.67        |
|                          | $R^2$                                               | 0.788        |
| Pseudo-second-order      | $k_2$ (g mg <sup>-1</sup> .min <sup>-1</sup> )      | 0.0024       |
|                          | $q_e$ (mg g <sup>-1</sup> )                         | 71.42        |
|                          | $R^2$                                               | 0.99         |
| Intra-particle diffusion | $k_{id}$ (mg g <sup>-1</sup> .min <sup>-1/2</sup> ) | 2.0539       |
|                          | Inters                                              | 41.11        |
|                          | $R^2$                                               | 0.95         |
| Boyd                     | $B$                                                 | 0.027        |
|                          | Inters                                              | 1.28         |
|                          | $R^2$                                               | 0.972        |

**Table S3.** Thermodynamic parameters for lead removal on IAC nanocomposite.

| Temp. (°C) | $\Delta G^\circ$<br>(kJ mol <sup>-1</sup> ) | $\Delta H^\circ$<br>(kJ mol <sup>-1</sup> ) | $T \cdot \Delta S^\circ$<br>(kJ mol <sup>-1</sup> ) | $\Delta S^\circ$<br>(kJ mol <sup>-1</sup> K <sup>-1</sup> ) | $R^2$ |
|------------|---------------------------------------------|---------------------------------------------|-----------------------------------------------------|-------------------------------------------------------------|-------|
| 25         | -27.979                                     |                                             | -33.614                                             |                                                             |       |
| 45         | -24.282                                     | -61.208                                     | -35.870                                             | -0.112                                                      | 0.957 |
| 60         | -24.2916                                    |                                             | -37.562                                             |                                                             |       |
